# Supplementary material for: Decreased PEDF Promotes Hepatic Fatty Acid Uptake and Lipid Droplet Formation in the Pathogenesis of NAFLD
Source: MDPI journal article supplement (doi:10.3390/nu12010270), 2020-01-20
Supplement: s1 [file s1]

## Supplementary Materials

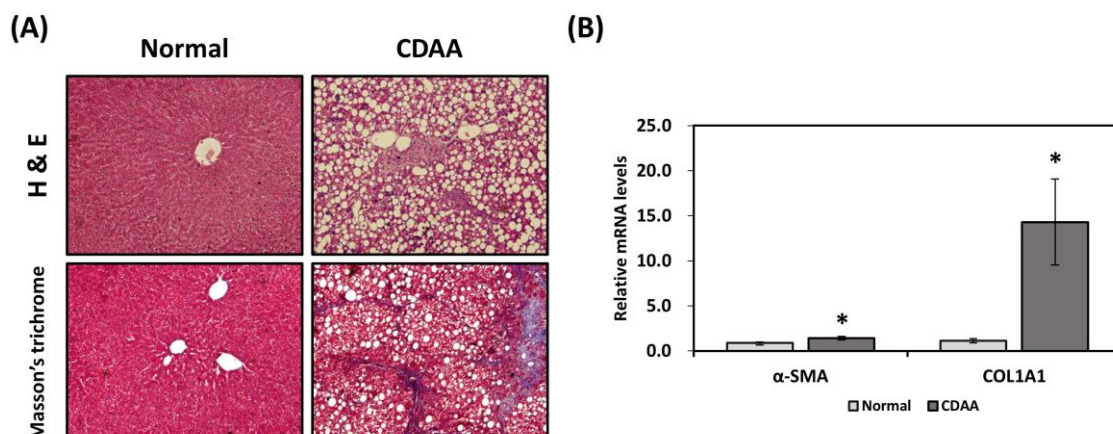

**Figure S1.** Mice on a CDAA diet develop hepatic fibrosis. **(A)** C57BL/6 mice were fed with a control or CDAA diet for 16 weeks. Liver sections were stained with H & E for histological evaluation and Masson's trichrome for collagen deposition. **(B)** Hepatic gene expression of  $\alpha$ -smooth muscle actin ( $\alpha$ -SMA) and collagen 1 $\alpha$ 1 (COL1A1) was determined using quantitative RT-PCR. \*, statistically significant compared with the normal diet group at  $p < 0.05$ .

**Table S1.** List of primers used in this study.

| Gene name      | Species | Forward primer            | Reverse primer           |
|----------------|---------|---------------------------|--------------------------|
| PEDF           | Human   | CGACCAACGTGCTCCTGTCT      | GATGTCTGGGCTGCTGATCA     |
| ATGL           | Human   | CAACGCCACGCACATCTAC       | CAATGAACCTGGCACCAGCC     |
| PPAR $\gamma$  | Human   | GATGACAGCGACTTGGCAAT      | TGAGGACTCAGGGTGGTTCA     |
| CD36           | Human   | GTGATGATGAACAGCAGCAACA    | CCTCAGCGTCCTGGGTACA      |
| FABP1          | Human   | GCTGGGTCCAAAGTGATCCA      | TGTCACCTTCCAACTGAACCA    |
| FATP2          | Human   | AGCGGATTGAAGGCAGATGA      | AGTCCGCAAGGCAAGAGTAG     |
| FATP4          | Human   | AAGCACAGAACACCTGGACC      | GTGGTGCCGGATGTGTAGAT     |
| $\beta$ -actin | Human   | TCTGGCACCACACCTTCTACAATG  | AGCACAGCCTGGATAGCAACG    |
| PEDF           | Mouse   | ACGATACGGCTTGGACTCTG      | GTCAAGTTCTGGGTCACGGT     |
| ATGL           | Mouse   | GCCAACGCCACTCACATCTA      | AATGTTGGCACCTGCTTCAC     |
| PPAR $\gamma$  | Mouse   | AGAGGGCCAAGGATTCATGACCAGG | TTCAGCTTGAGCTGCAGTTCAGGG |
| CD36           | Mouse   | TGGCCAAGCTATTGCGACAT      | TTCAGATCCGAACACAGCGT     |
| $\alpha$ -SMA  | Mouse   | GACAGGATGCAGAAGGAGATCAC   | AGCCACCGATCCAGACAGAGT    |
| COL1A1         | Mouse   | CGTCTGGTTTGGAGAGAGCAT     | TGGACATTAGGCGCAGGAA      |
| $\beta$ -actin | Mouse   | TGTCCACCTTCCAGCAGATGT     | AGCTCAGTAACAGTCCGCCTAGA  |
